# Supplementary material for: Large-scale synthesis of 2D-silica (SiOx) nanosheets using graphene oxide (GO) as a template material
Source: Royal Society of Chemistry journal article supplement (doi:10.1039/d3nr01048a), 2023-01-01
Supplement: d3nr01048a1.pdf [file d3nr01048a1.pdf]

## Supporting information

### Large-scale synthesis of 2D-Silica ( $\text{SiO}_x$ ) nanosheets using Graphene oxide (GO) as a template material

Björn K Birdsong<sup>a</sup>, Billy Hoogendoorn<sup>a</sup>, Fritjof Nilsson<sup>a,d</sup>, Richard L. Andersson<sup>a</sup>, Antonio Capezza<sup>a</sup>, Mikael Hedenqvist<sup>a</sup>, Stefano Farris<sup>b</sup>, Antonio Guerrero<sup>c</sup>, and Richard T Olsson<sup>\*a</sup>

<sup>a</sup>Department of Fibre and Polymer Technology, KTH Royal Institute of Technology, Teknikringen 58, 11428, Stockholm, Sweden.

<sup>b</sup>DeFENS - Department of Food, Environmental and Nutritional Sciences Food Packaging Laboratory, Via Celoria 2, 20133, Milan, Italy.

<sup>c</sup>Department of Chemical Engineering, Escuela Politécnica Superior, Universidad de Sevilla, 41011, Sevilla, Spain.

---

Corresponding authors.

*E-mail address:* [\\*rols@kth.se](mailto:*rols@kth.se) (R. T. Olsson)

**Table S1.** Compositions of the reaction mixtures used in all reactions.

| Sample name            | 2-propanol (ml) | APTES (ml) | TEOS (ml) | GO (ml) | MQw (ml) | Ammonia (ml) |
|------------------------|-----------------|------------|-----------|---------|----------|--------------|
| Reference High APTES   | 71.37           | 10         | -         | -       | 18,53    | 0.1          |
| Reference High TEOS    | 71.37           | -          | 10        | -       | 18.53    | 0.1          |
| Low APTES Coated GO    | 81.36           | 0.01       | -         | 18.53   | -        | 0.1          |
| Medium APTES Coated GO | 81.27           | 0.1        | -         | 18.53   | -        | 0.1          |
| High APTES Coated GO   | 71.37           | 10         | -         | 18.53   | -        | 0.1          |
| Low TEOS Coated GO     | 81.36           | -          | 0.01      | 18.53   | -        | 0.1          |
| Medium TEOS Coated GO  | 81.27           | -          | 0.1       | 18.53   | -        | 0.1          |
| High TEOS Coated GO    | 71.37           | -          | 10        | 18.53   | -        | 0.1          |

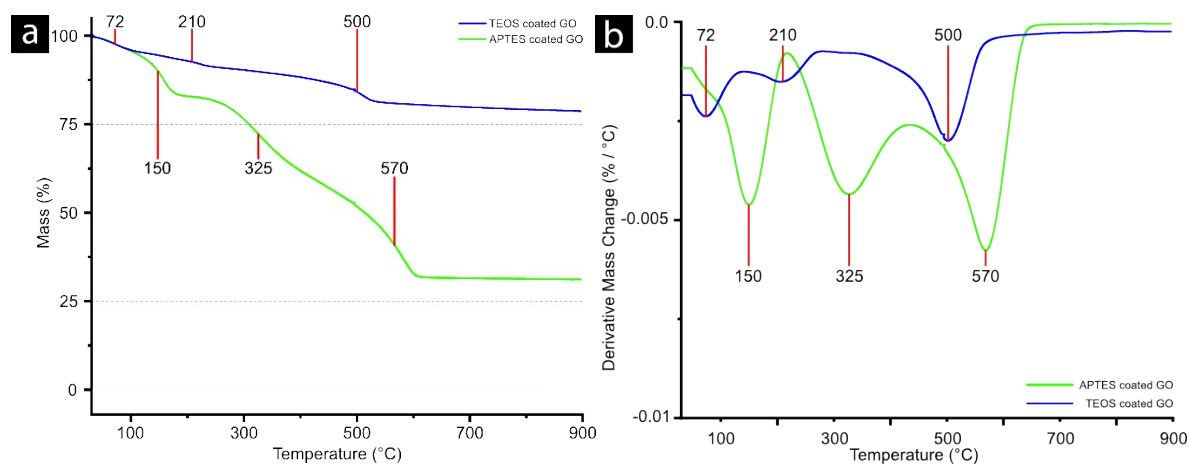

**Fig. S1.** TGA curves for TEOS coated GO and APTES coated GO (a), and their respective mass change derivative (b). The highlighted temperatures correspond to the temperature where the maximum mass loss rate occurs.

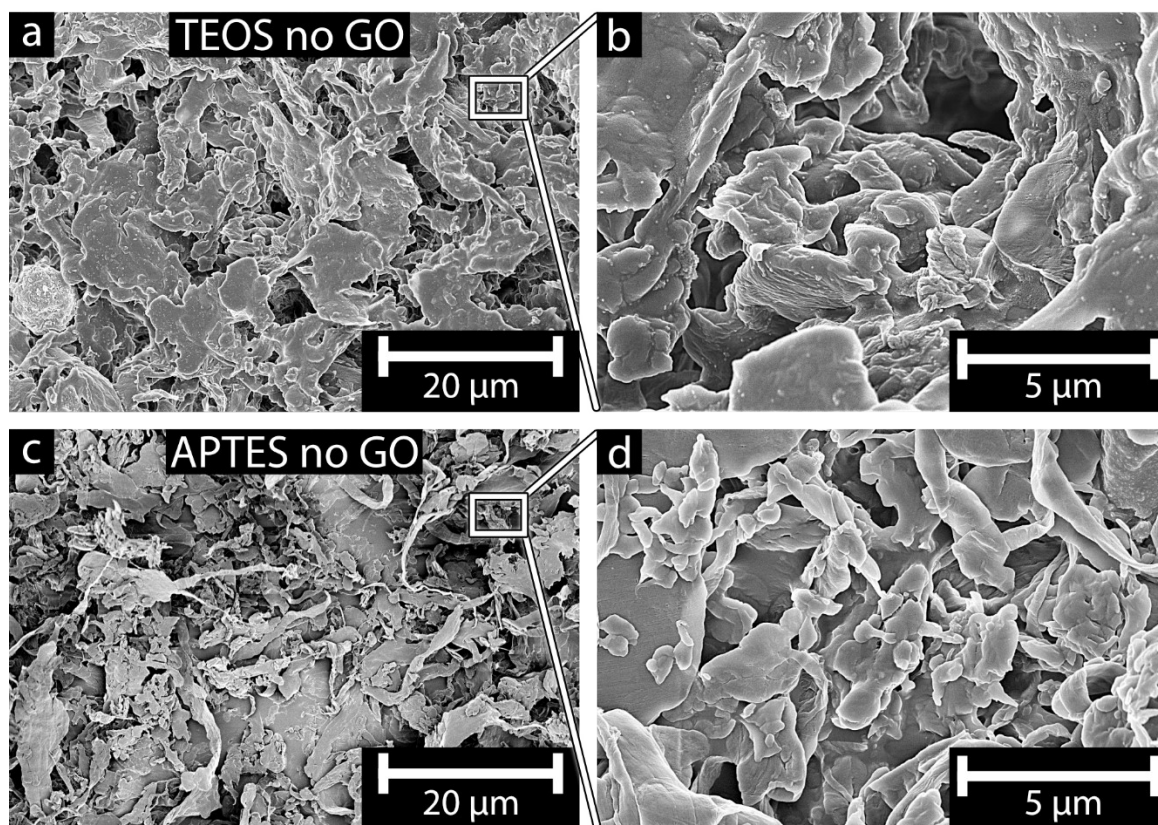

**Fig. S2.** Micrographs of material obtained from the condensation reaction using TEOS (a and b), and APTES (c and d), without the presence of a GO template, insets do not represent the shown magnified area.

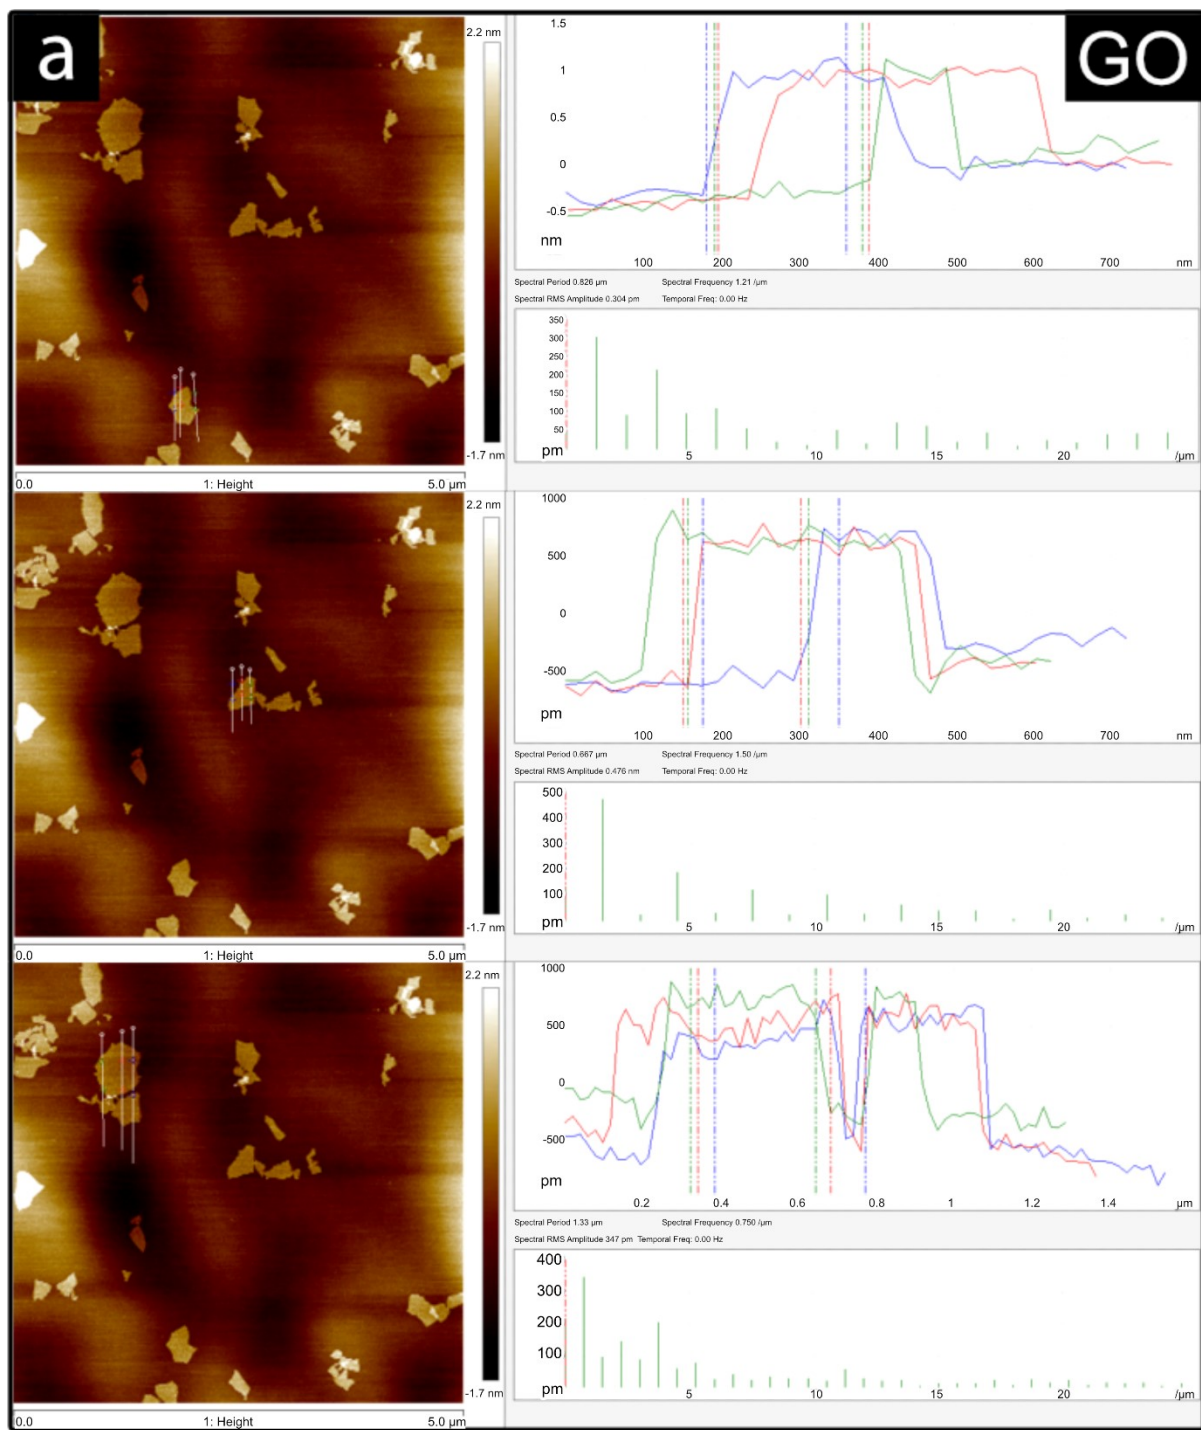

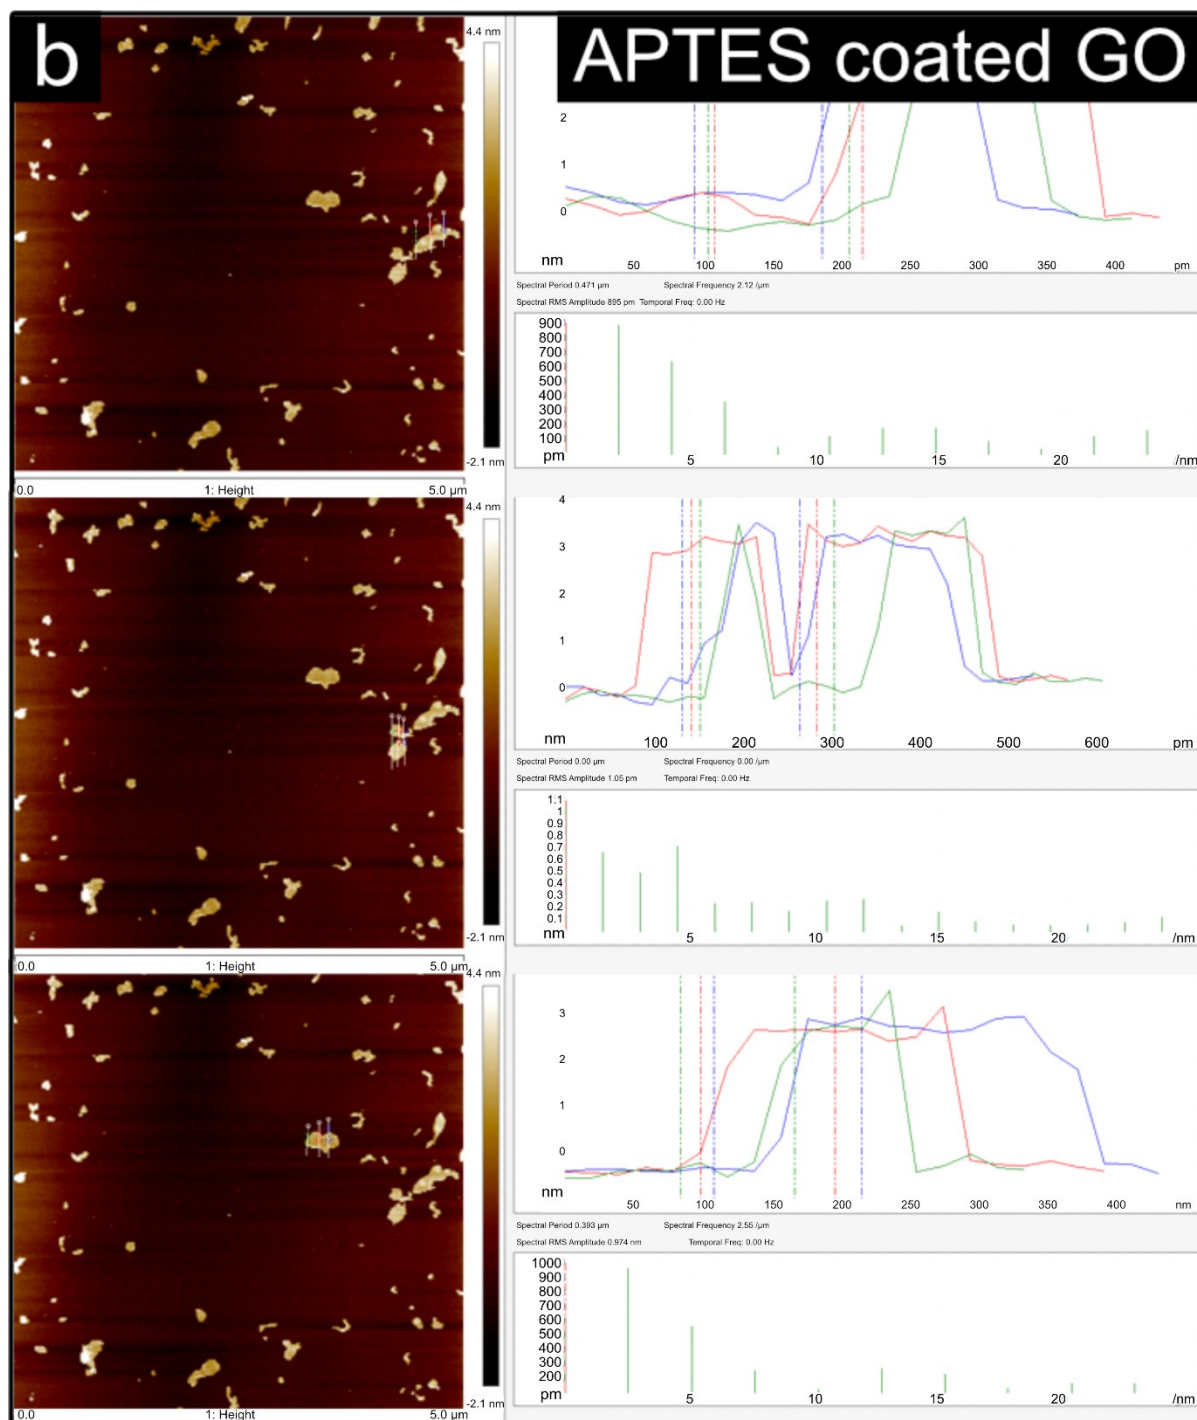

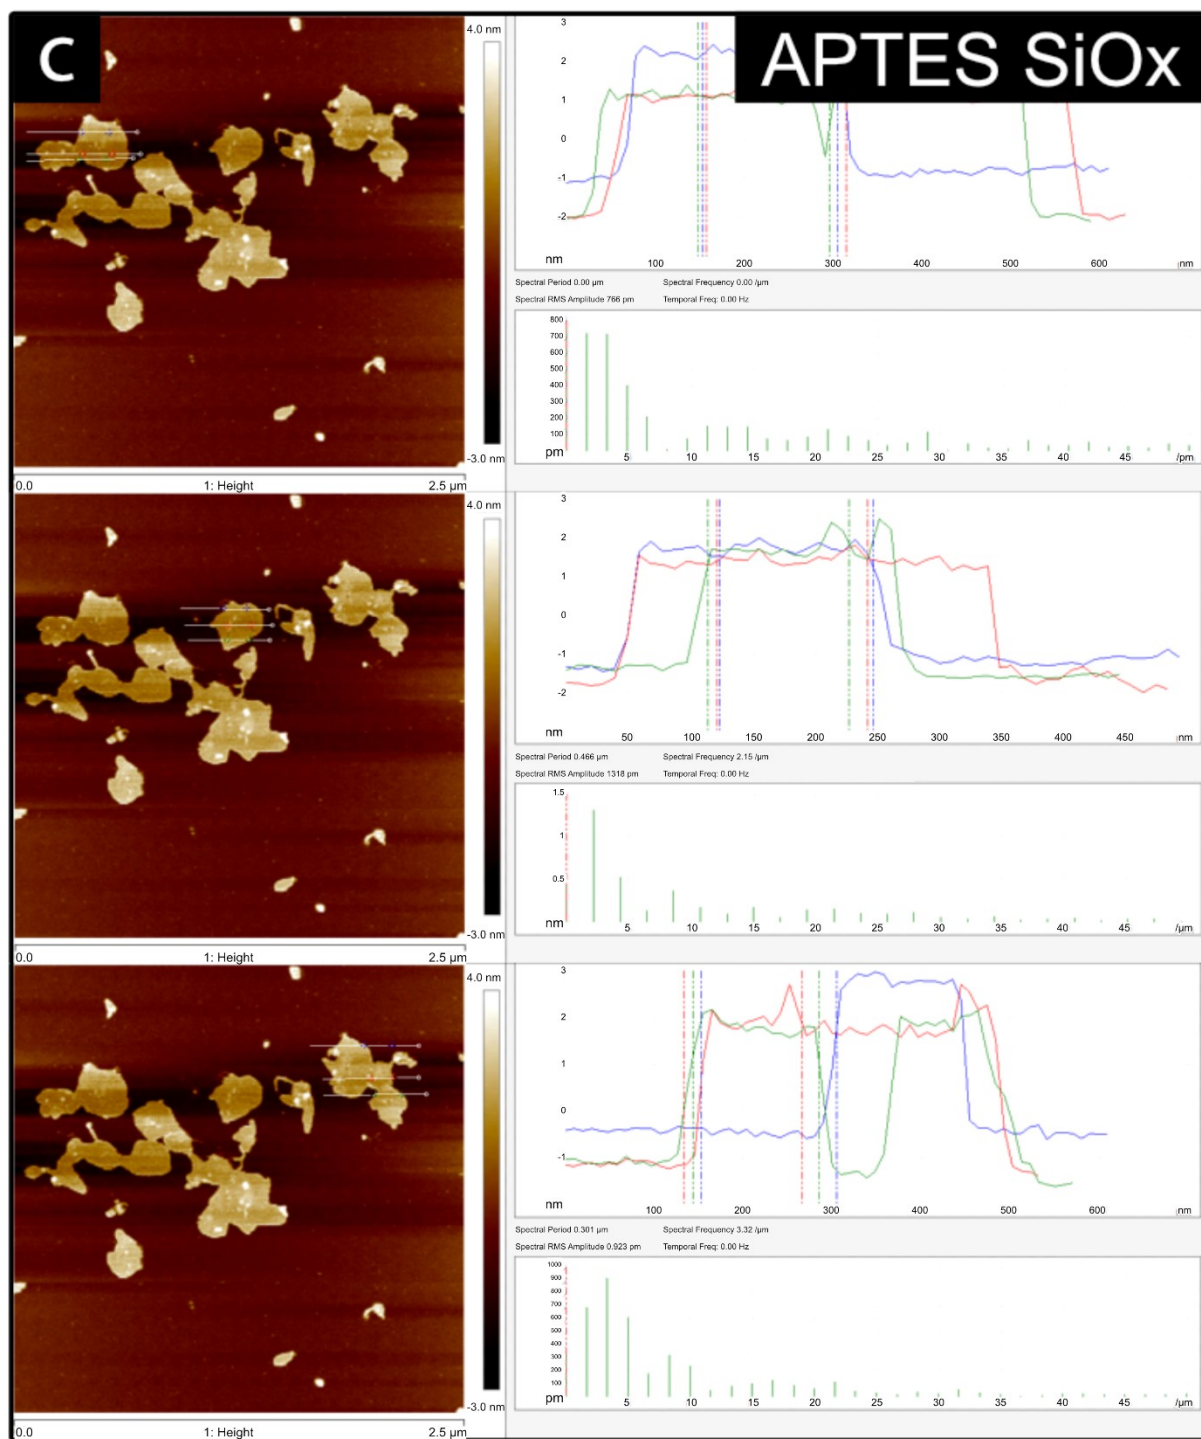



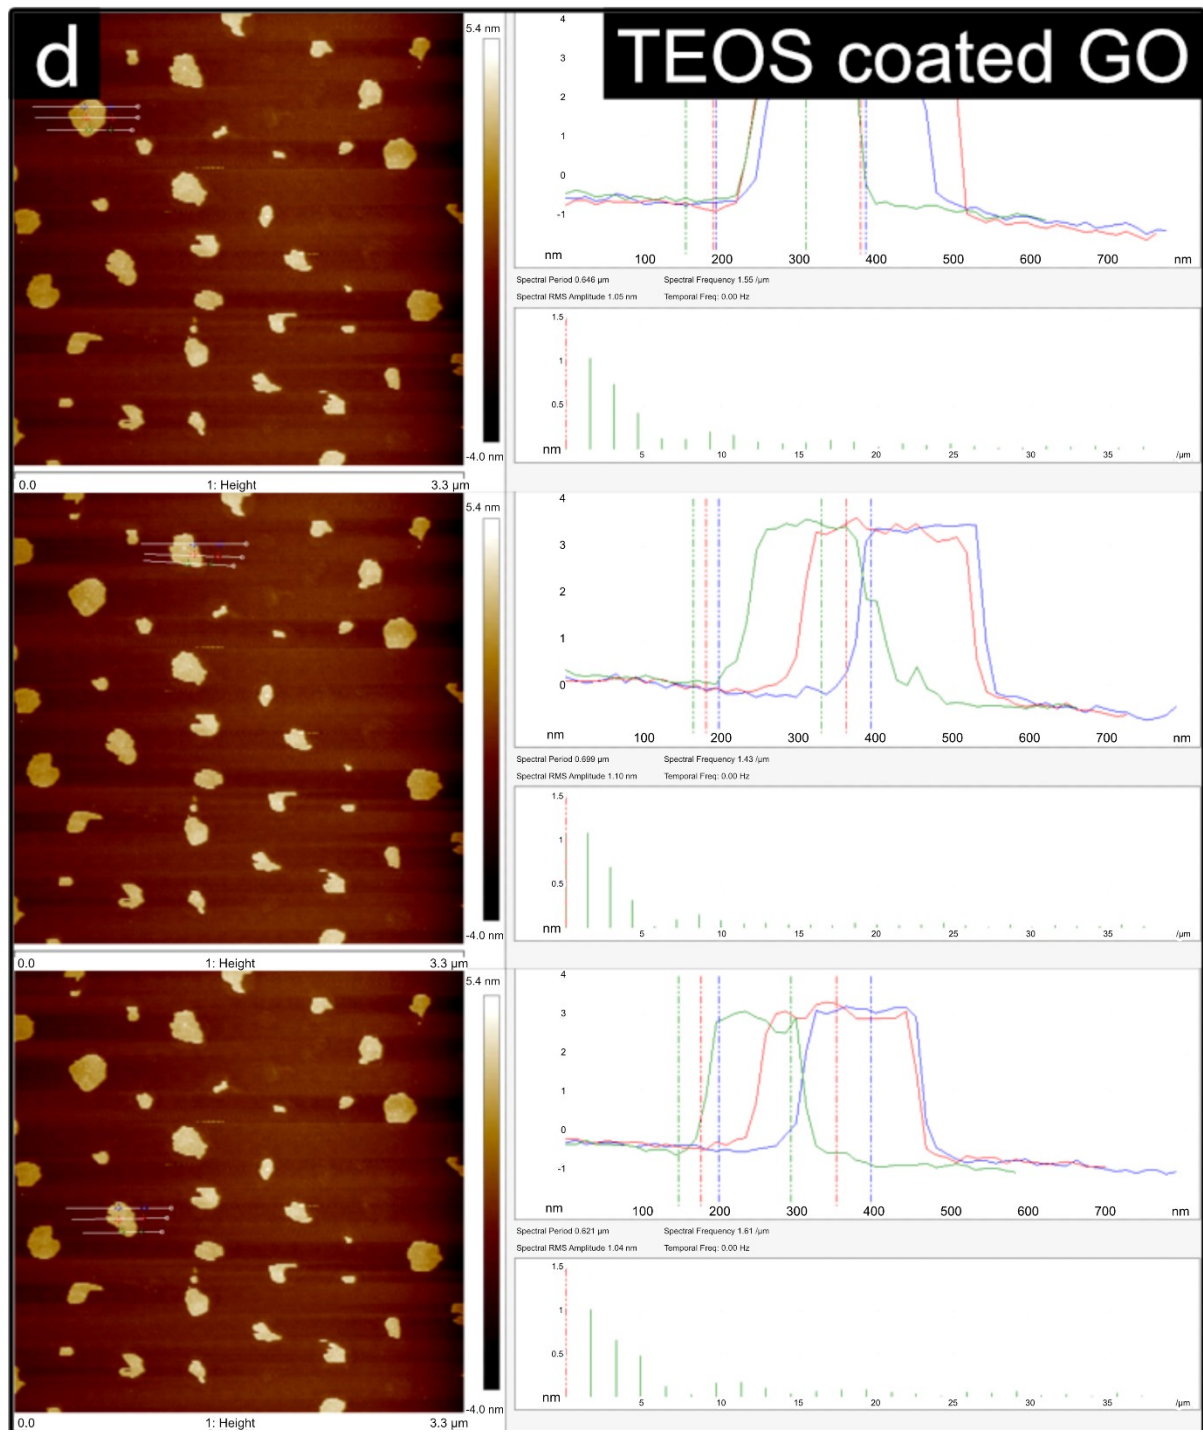



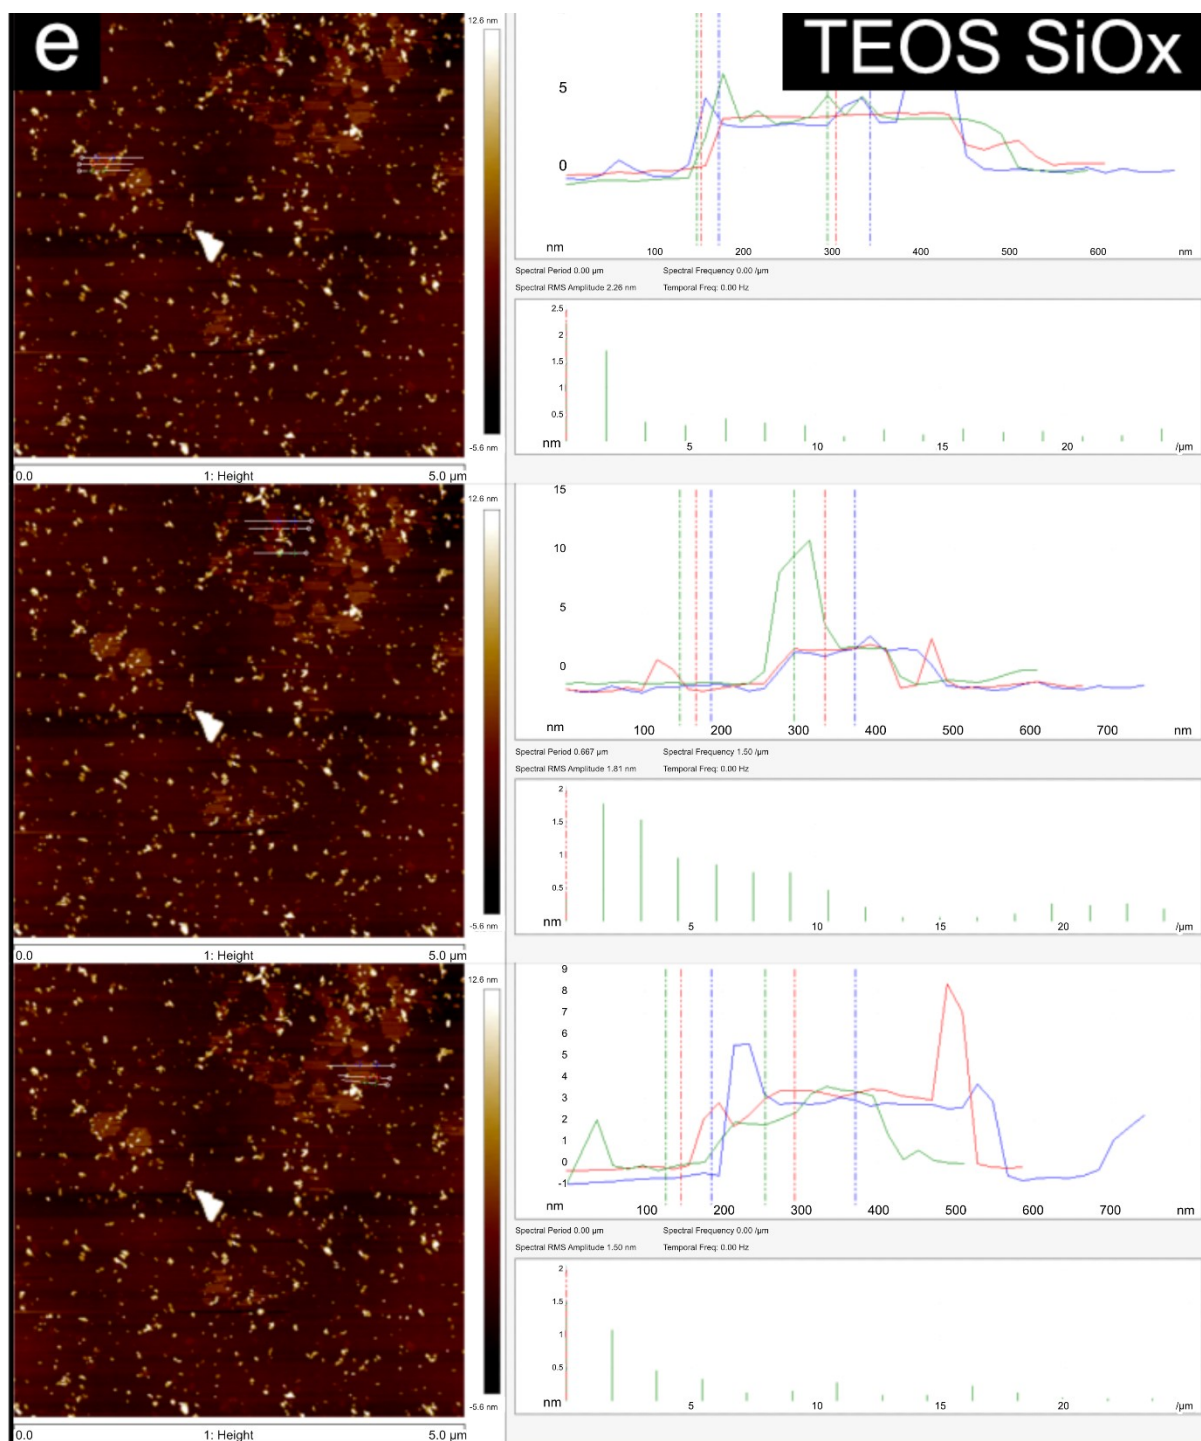

**Fig. S3.** AFM images used for thickness determination.

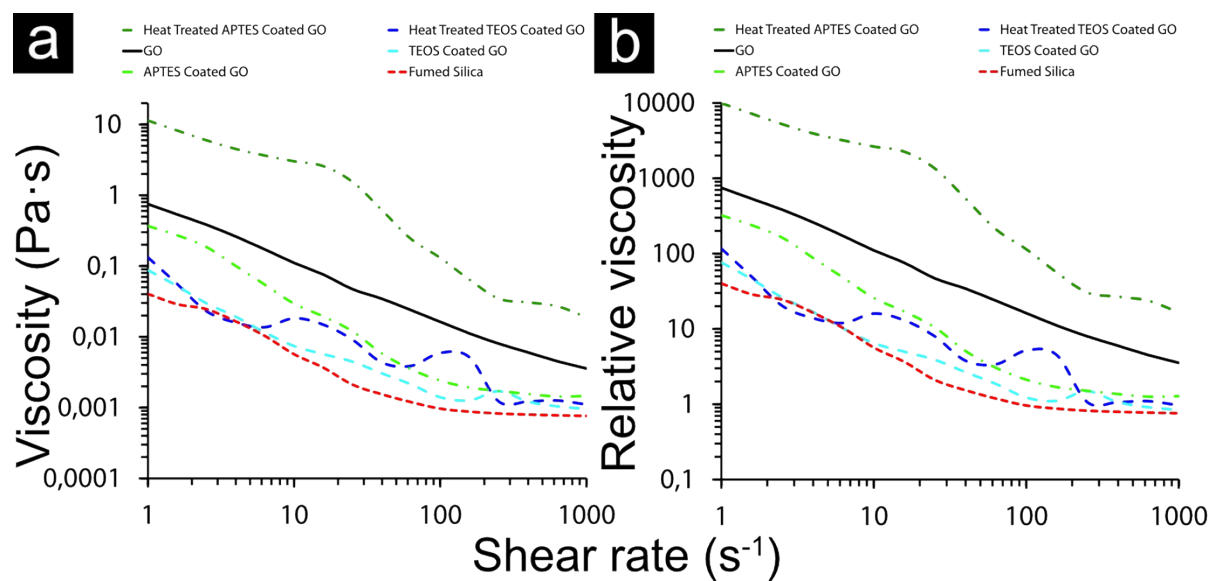

**Fig. S4.** Rheological data for 0.5 wt.% suspensions using single measurements. Untreated viscosity data (a), and relative viscosity (accounting for solvent present in suspension) (b).

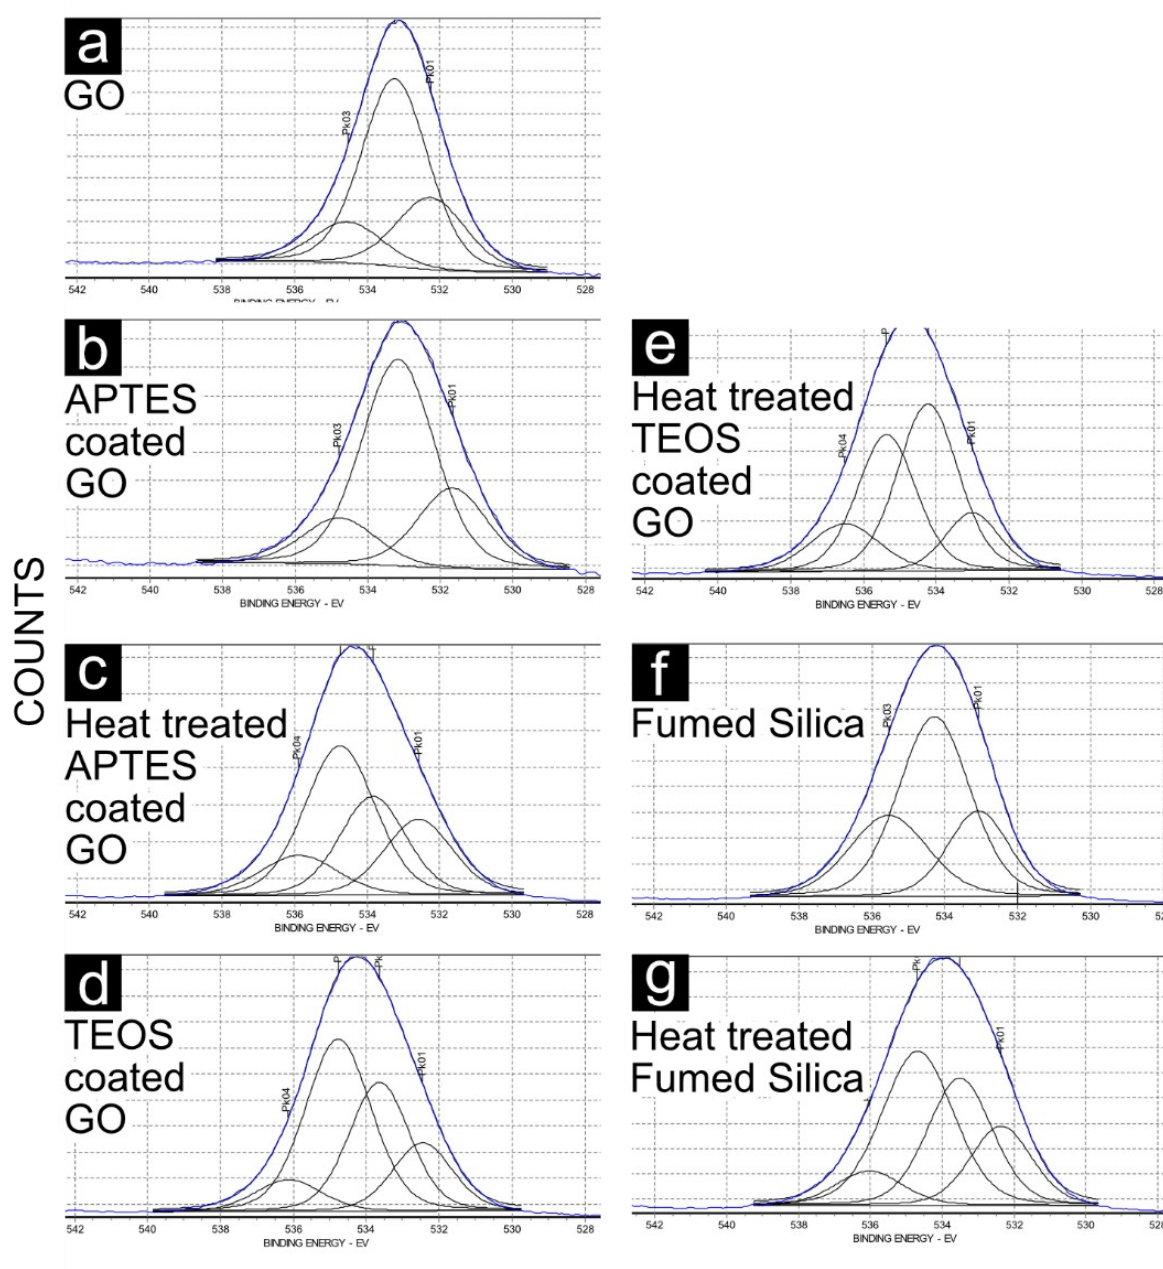

**Fig. S5** O 1s XPS spectra for GO (a), silane coated GO (b, and d), heat treated silane coated GO (586 °C) (c, and e), and Fumed silica pre and post heat treatment (586 °C) (f-g).

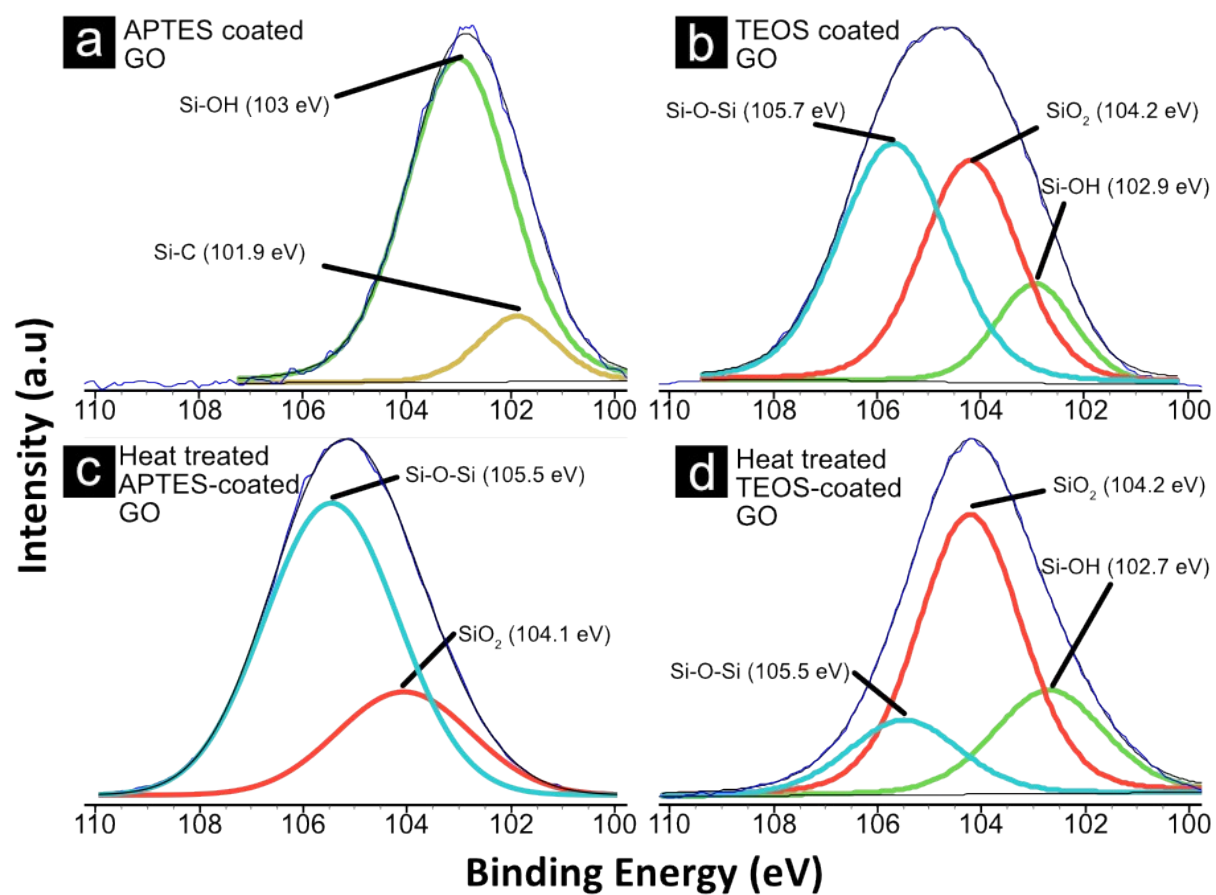

**Fig. S6** Si 2p XPS for APTES coated GO (a), TEOS coated GO (b), heat treated APTES and TEOS coated GO (586 °C) (c, and d).

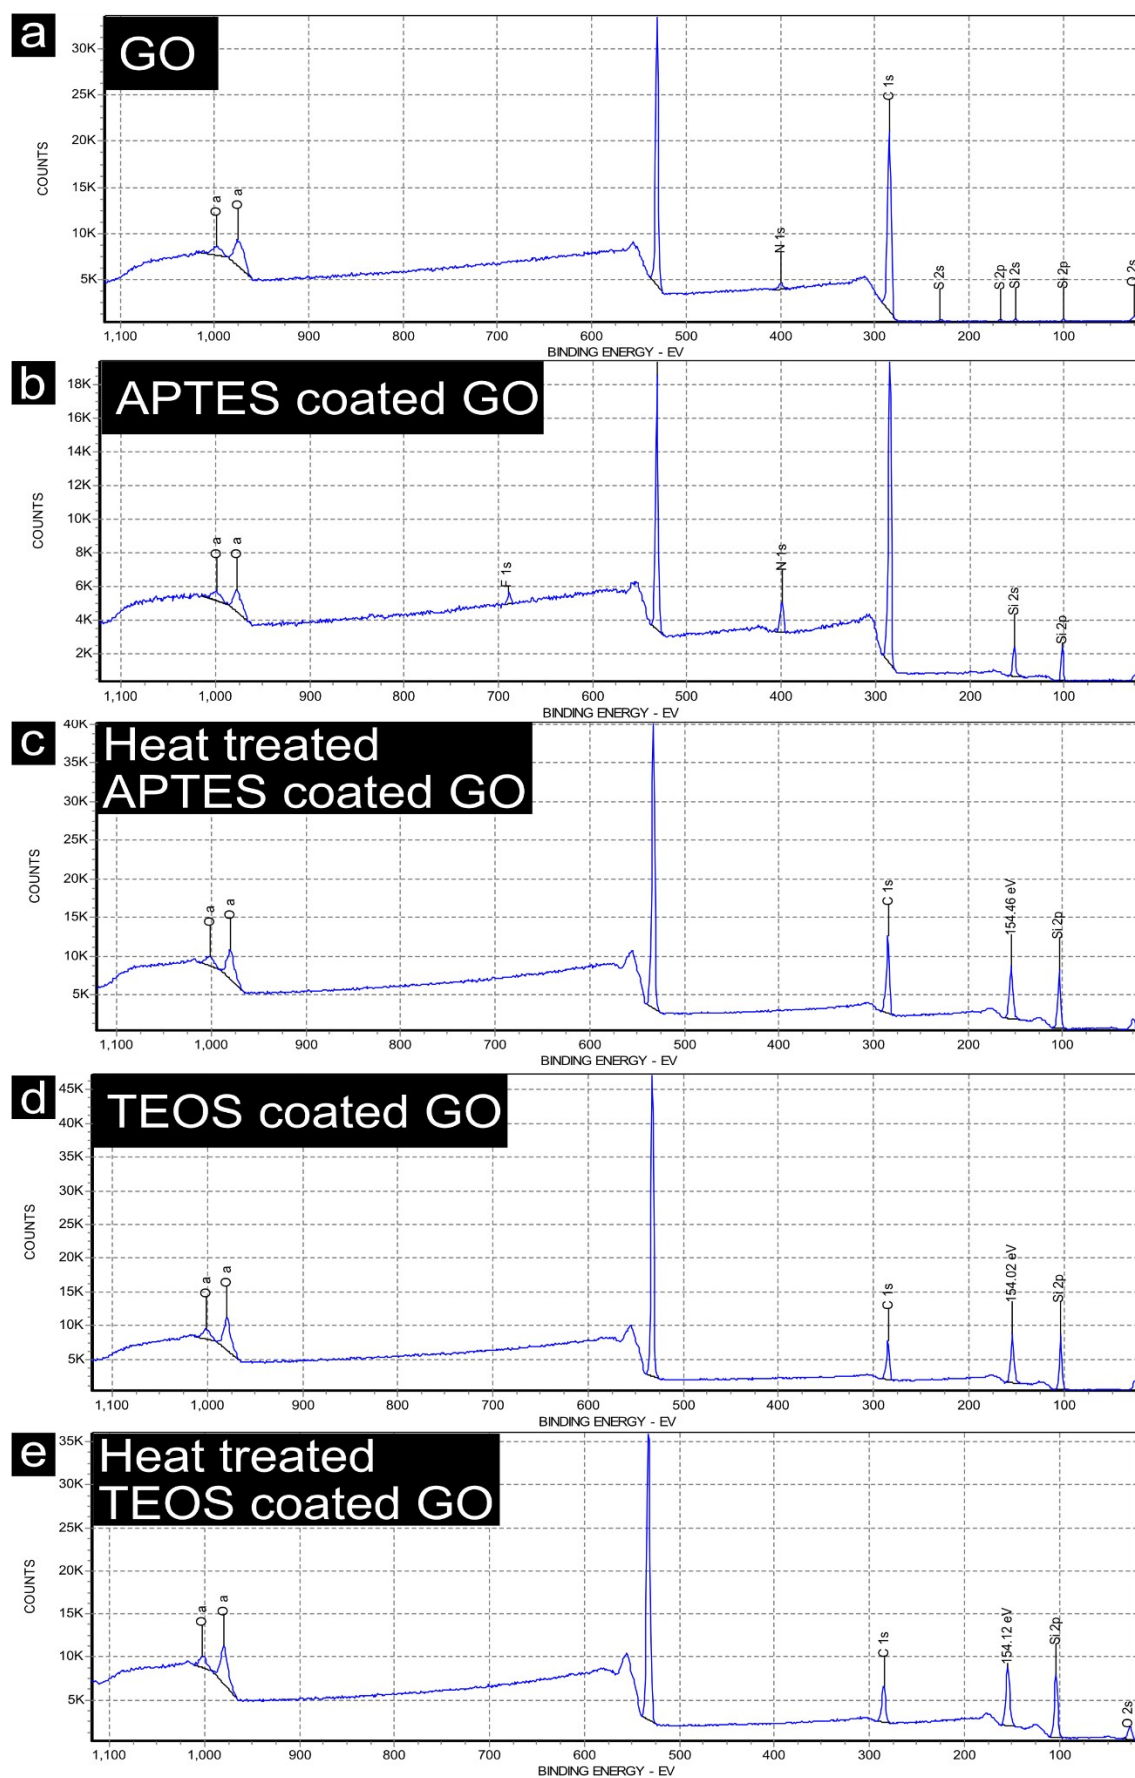

**Fig. S7** High resolution survey XPS spectra of investigated materials. GO (a), silane coated GO (b, and d), and heat treated silane coated GO (586 °C) (c, and e).



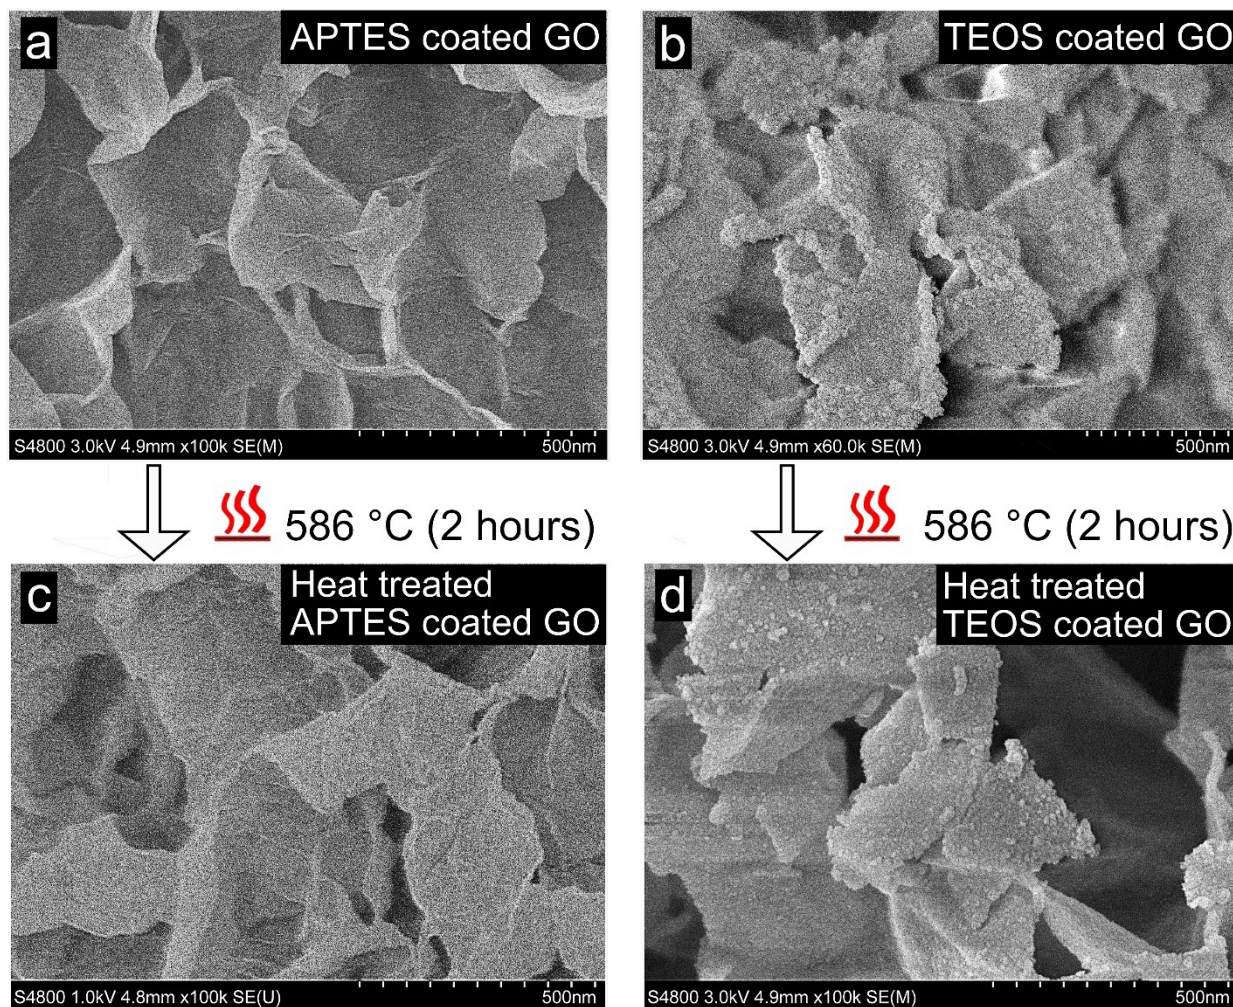

**Fig. S8** High resolution SEM images showing APTES coated GO and TEOS coated GO pre heat treatment (a and b respectively), and Post heat treatment (c and d respectively). Fig. 9 b and d (TEOS) highlight the more grainy surface structure as compared to Fig. 9 a and c (APTES).
